# Supplementary material for: Lack of cortistatin or somatostatin differentially influences DMBA-induced mammary gland tumorigenesis in mice in an obesity-dependent mode
Source: Springer Nature journal article supplement (doi:10.1186/s13058-016-0689-1), 2016-03-08
Supplement: MOESM1 [file 9781674]

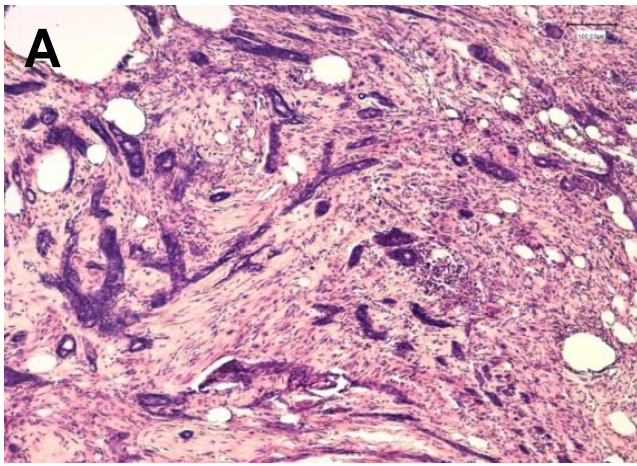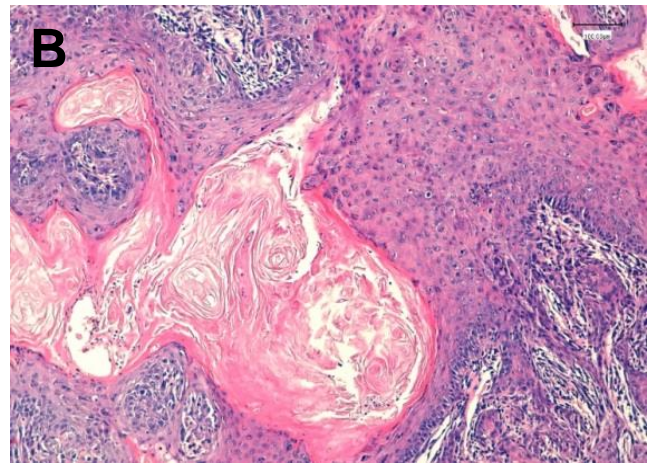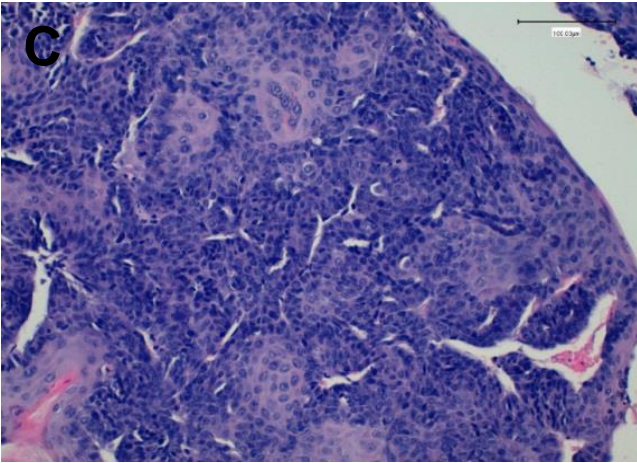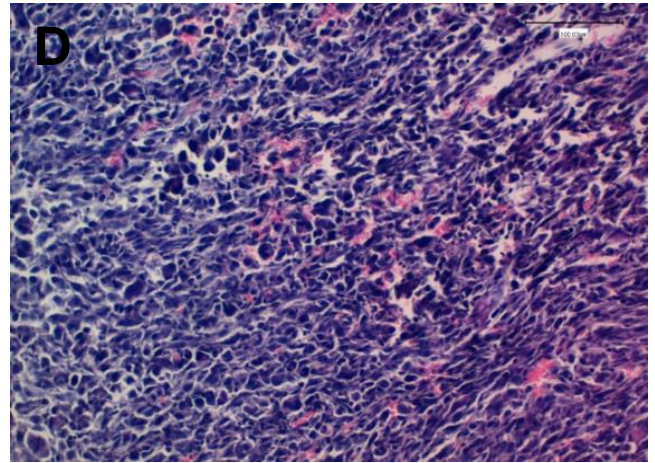

| <b>WT LF<br/>(n=3)</b>                       | <b>WT HF<br/>(n=2)</b>                             | <b>CORT-KO LF<br/>(n=10)</b>                 | <b>CORT-KO HF<br/>(n=4)</b>                        | <b>SST-KO LF</b>           | <b>SST-KO HF<br/>(n=4)</b>                   |
|----------------------------------------------|----------------------------------------------------|----------------------------------------------|----------------------------------------------------|----------------------------|----------------------------------------------|
| Undifferentiated carcinoma (n=2)             | Undifferentiated carcinoma (n=1)                   | Well-differentiated squamous carcinoma (n=3) | Undifferentiated carcinoma (n=2)                   | No palpable tumor detected | Undifferentiated carcinoma (n=3)             |
| Well-differentiated squamous carcinoma (n=1) | Moderately-differentiated squamous carcinoma (n=1) | Undifferentiated carcinoma (n=7)             | Well-differentiated squamous carcinoma (n=1)       |                            | Well-differentiated squamous carcinoma (n=1) |
|                                              |                                                    |                                              | Moderately-differentiated squamous carcinoma (n=1) |                            |                                              |
